# Supplementary material
Source: publisher figshare collection journal article supplement (https://acs.figshare.com/ndownloader/files/3757828)
Supplement: Supplementary file 1 [file 3757828]

## Supporting Information to

### Electrochemical Investigations of the N-type Semiconducting Polymer P(NDI2OD-T2) and Its Monomer: New Insights in the Reduction Behavior

Daniel Trefz<sup>1,§</sup>, Adrian Ruff<sup>1,⊥,§</sup>, Roman Tkachov<sup>1,2</sup>, Matthias Wieland<sup>1</sup>, Miriam Goll<sup>1</sup>, Anton Kiriya<sup>2</sup>, Sabine Ludwigs<sup>1,\*</sup>

(1) IPOC-Functional Polymers, University of Stuttgart, Pfaffenwaldring 55, 70569 Stuttgart, Germany

(2) Leibniz-Institut für Polymerforschung Dresden e.V., Hohe Straße 6, 01069 Dresden, Germany

[⊥] present address: Analytical Chemistry - Center for Electrochemical Sciences (CES), Ruhr-Universität-Bochum, Universitätsstr. 150, D-44780 Bochum

[§] These authors contributed equally to this work

\* Corresponding author:

Tel: +49 711 685 64441

Fax: +49 711 685 64396

[sabine.ludwigs@ipoc.uni-stuttgart.de](mailto:sabine.ludwigs@ipoc.uni-stuttgart.de)

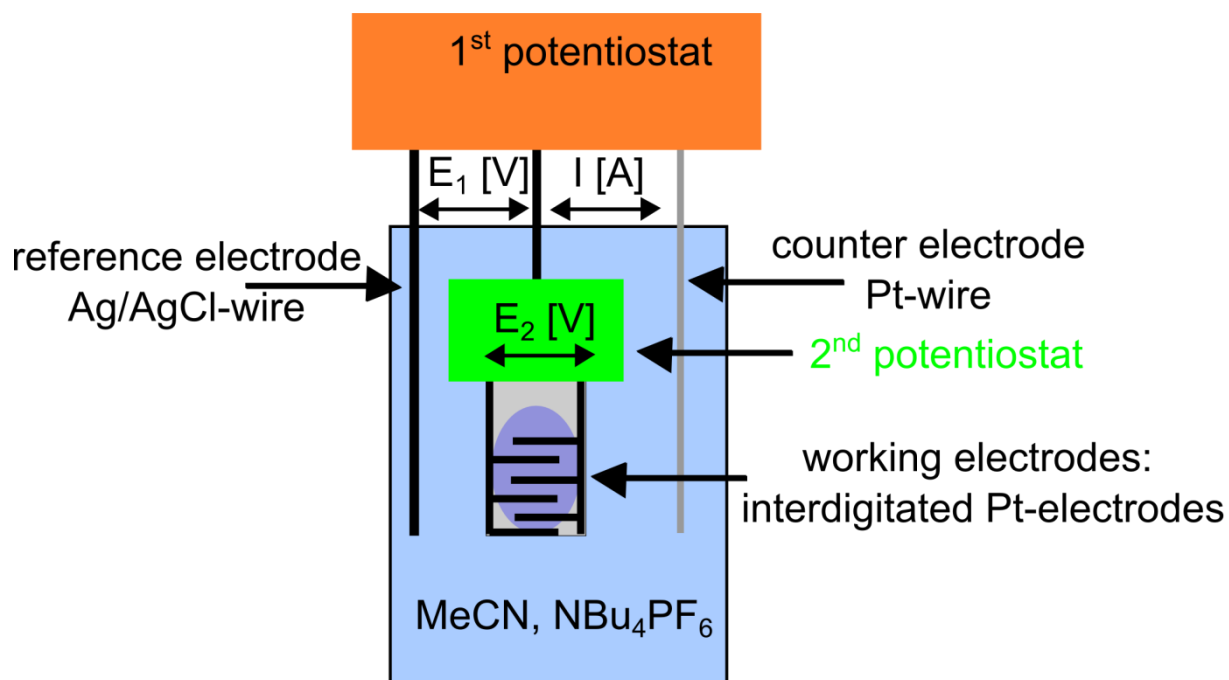

**Figure S1:** Schematic of the in-situ conductance and CV measurement setup.<sup>1</sup>

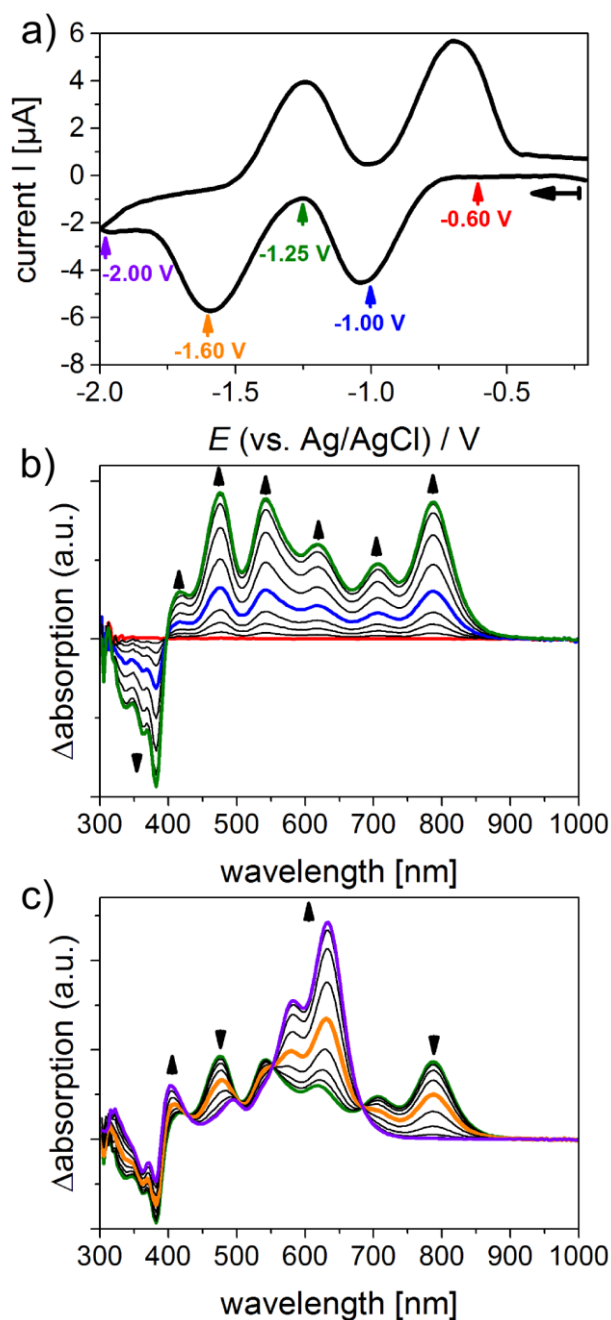

**Figure S2:** In-situ spectroelectrochemical characterization of the monomer Br-NDI2OD-T2-Br corresponding to Fig 1 in the main manuscript. a) Cyclic voltammogram of the in-situ spectroelectrochemistry on Br-NDI2OD-T2-Br ( $c = 0.97$  mM) in 0.1 M  $\text{NBu}_4\text{PF}_6/\text{THF}$  at a Pt disk electrode under thinlayer conditions (scan rate =  $20 \text{ mV s}^{-1}$ ). Colors of arrows in a) indicate the potential at which the UV-vis spectra in b) and c) are recorded. b) and c) Difference UV-vis absorption spectra recorded during the forward scan in potential windows of  $-0.60 \text{ V}$  to  $-1.25 \text{ V}$  (b, first reduction) and  $-1.25 \text{ V}$  to  $-2.00 \text{ V}$  (c, second reduction). The spectra were taken every  $0.05 \text{ V}$ .

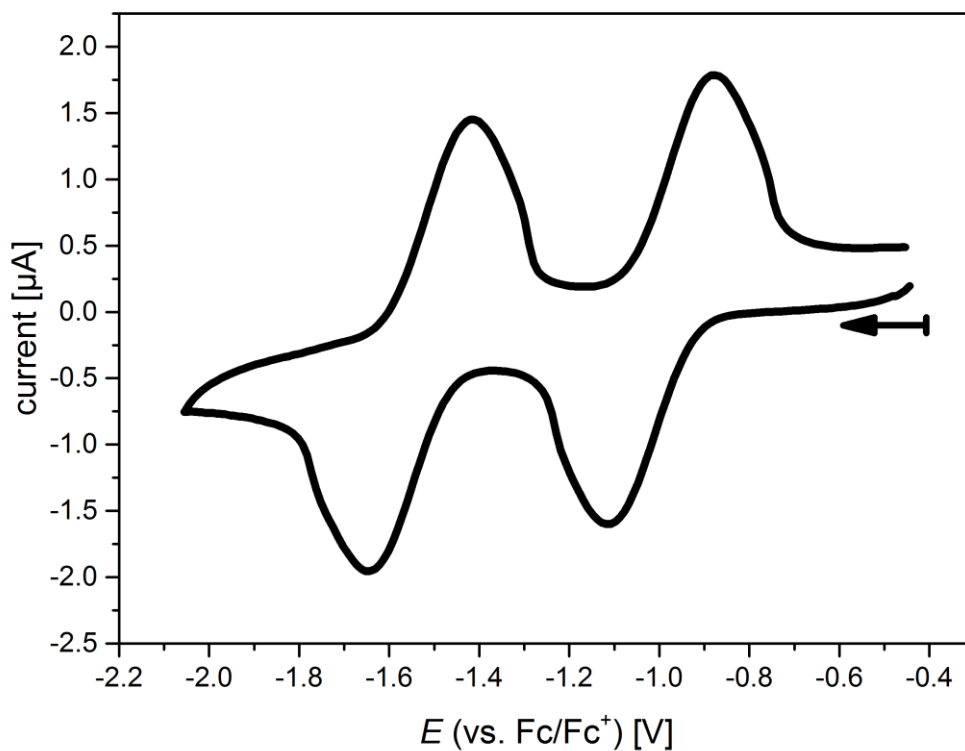

**Figure S3:** Cyclic voltammogram recorded during the in-situ spectroelectrochemistry of Br-NDI2OD-T2-Br ( $c = 0.97$  mM) in 0.1 M NBu<sub>4</sub>PF<sub>6</sub>/THF at a Pt disk electrode under thin layer conditions (scan rate = 20 mV s<sup>-1</sup>) corresponding to Fig. 1 in the main manuscript.

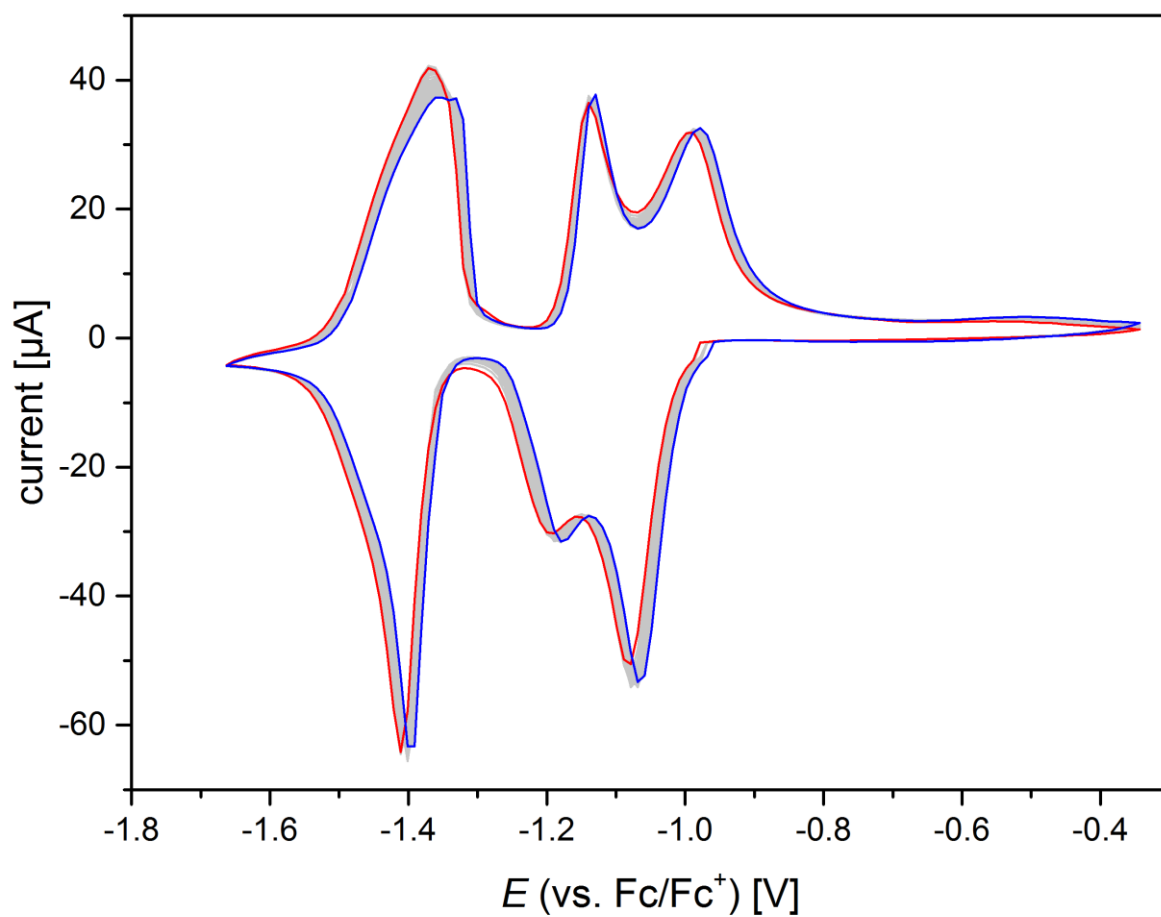

**Figure S4:** Multi-cyclic voltammogram (3<sup>rd</sup> cycle: red and 25<sup>th</sup> cycle: blue) of a P(NDI2OD-T2) film spincoated from 3 mg/ml CB solution on ITO in 0.1 M NBu<sub>4</sub>PF<sub>6</sub>/MeCN. All cycles were recorded with a scan rate of 100 mV s<sup>-1</sup> without stirring the solution between two cycles.

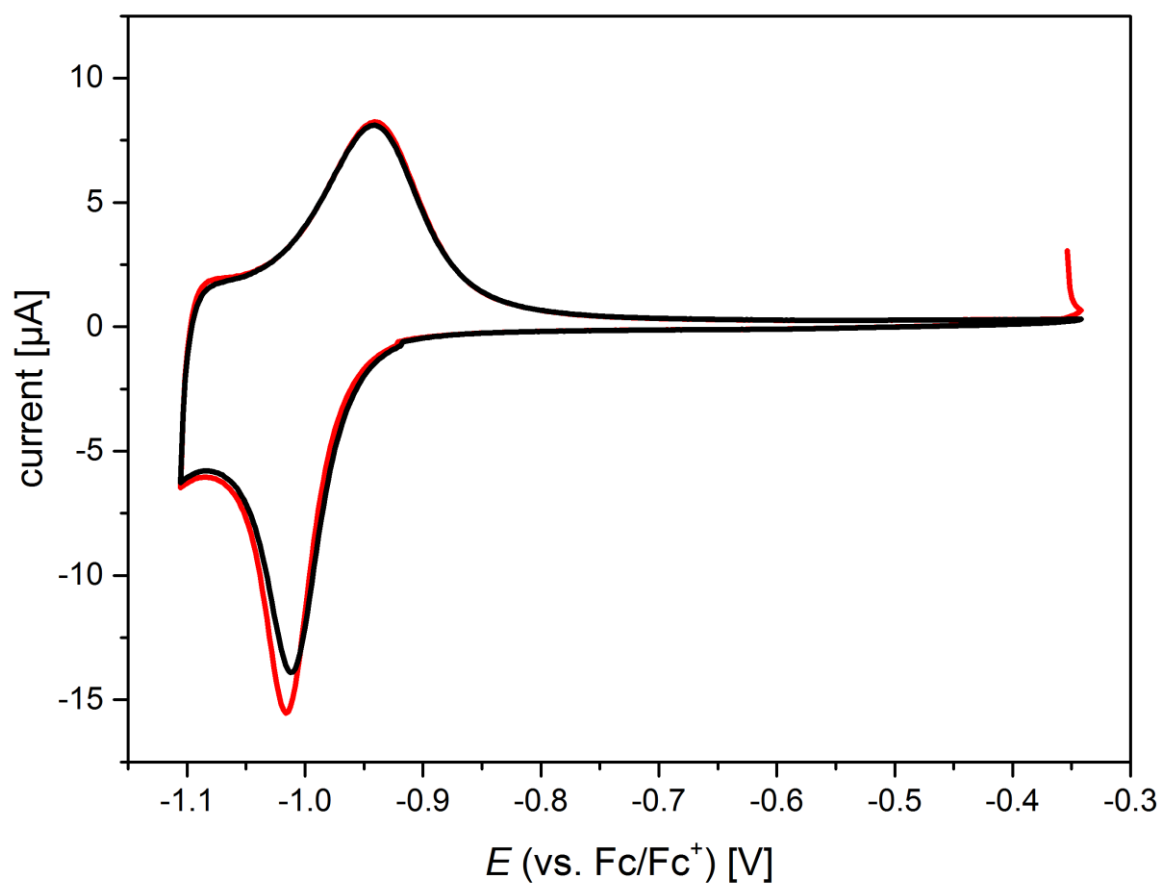

**Figure S5:** 1<sup>st</sup> (red) and 2<sup>nd</sup> (black) cycle of a P(NDI2OD-T2) film spincoated from 3 mg/ml CB solution on ITO in 0.1 M NBu<sub>4</sub>PF<sub>6</sub>/MeCN showing only the very first redox wave. All cycles were recorded with a scan rate of 20 mV s<sup>-1</sup>.

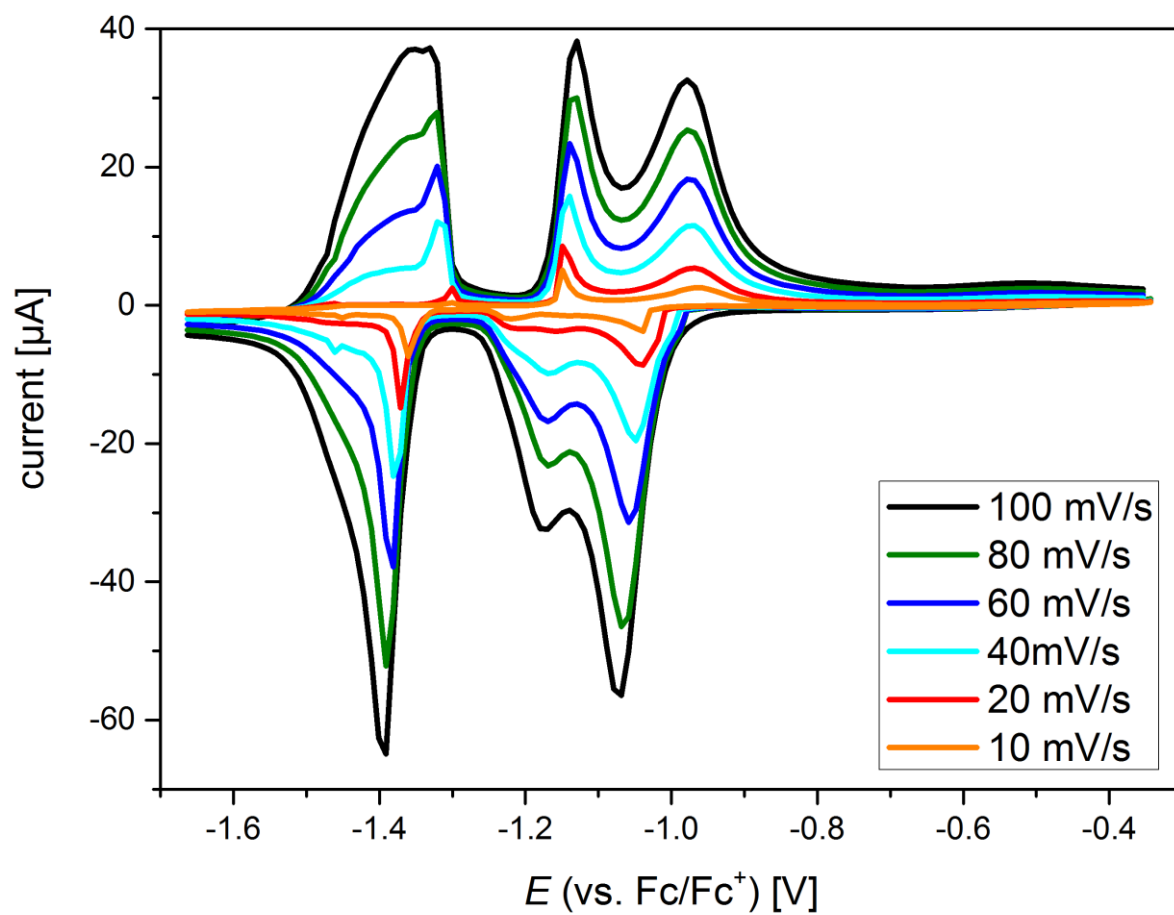

**Figure S6:** Cyclic voltammograms of a P(NDI2OD-T2) film spincoated on ITO from 3 mg/ml  $\text{CHCl}_3$  at different scan rates (electrolyte: 0.1 M  $\text{NBu}_4\text{PF}_6/\text{MeCN}$ ).

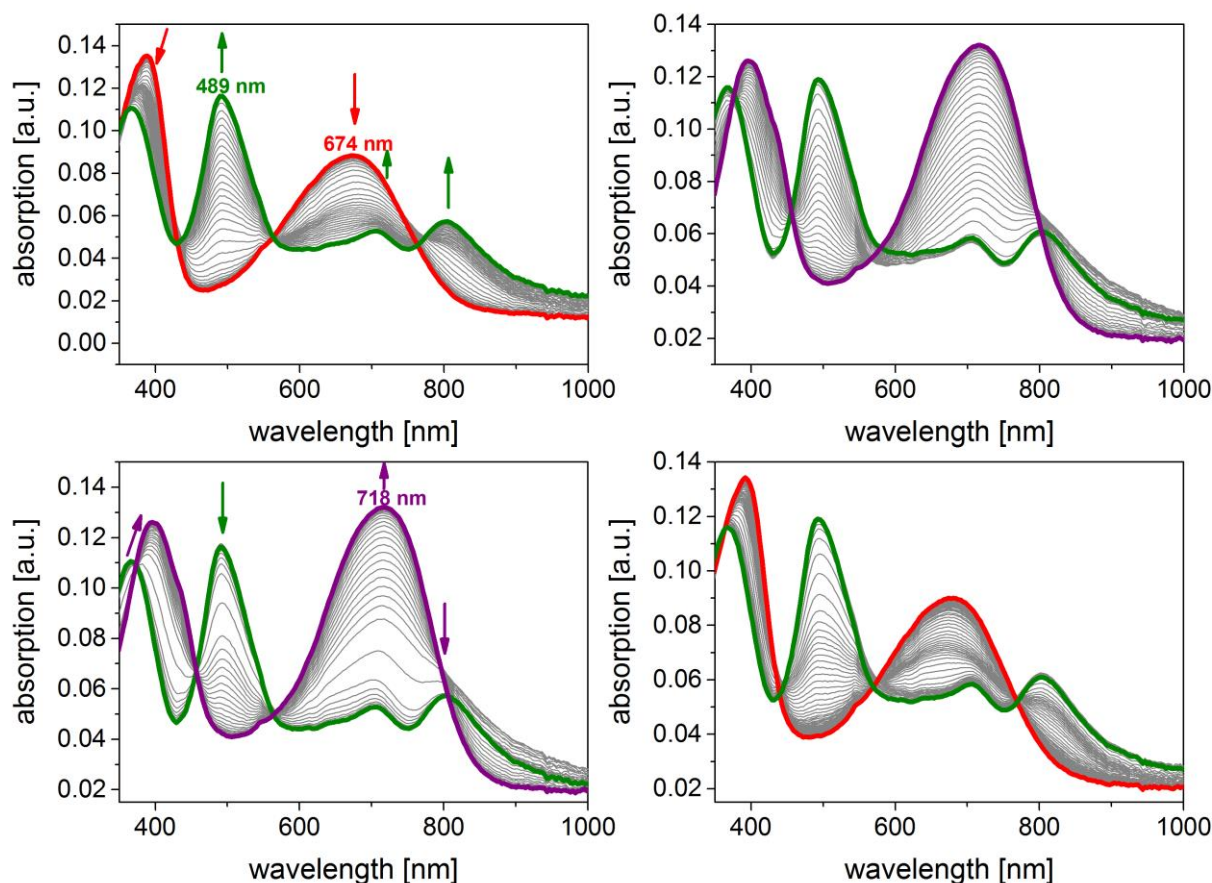

**Figure S7:** In-situ spectroelectrochemistry of P(NDI2OD-T2) spincoated from 3 mg/ml CB solution onto ITO, measured in 0.1 M NBu<sub>4</sub>PF<sub>6</sub>/MeCN. Left side: UV-vis spectra recorded during the forward scan in the cyclic voltammogram corresponding to Fig. 2 in the main manuscript. Colors of arrows in Fig 2 a) indicate the potential at which the UV-vis spectra are recorded. Right side: UV-vis spectra recorded during the backward scan in the cyclic voltammogram (purple: -1.77 V, green: -1.2 V and red: -0.37 V). The spectra were taken every 0.01 V.

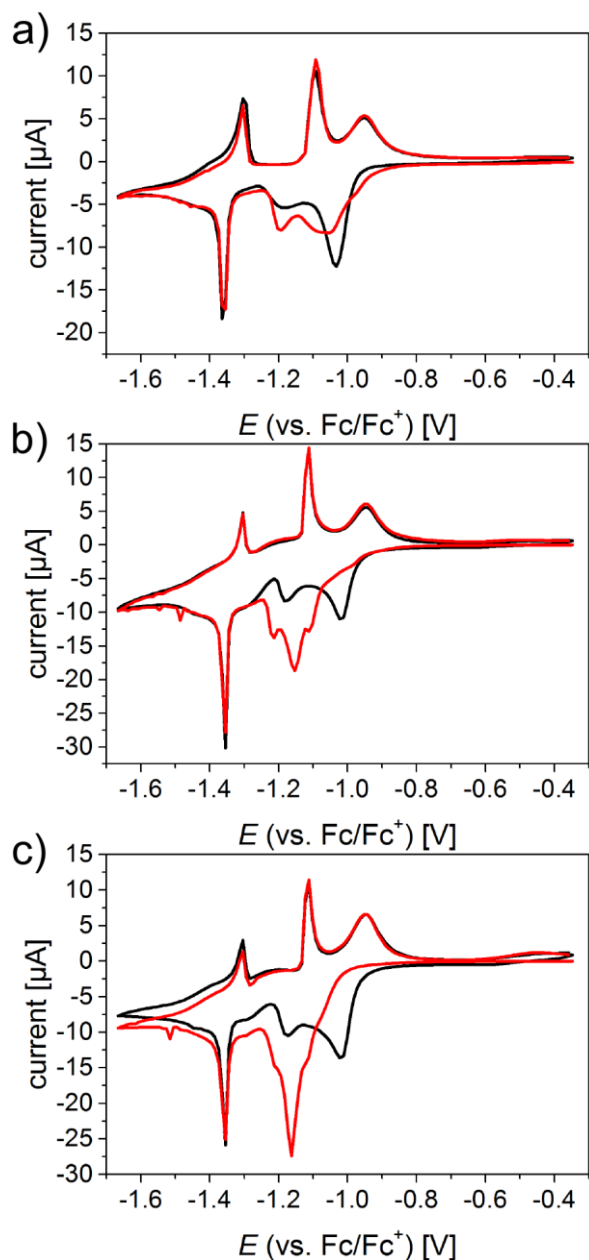

**Figure S8:** Cyclic voltammograms of different film morphologies of the low molecular weight P(NDI2OD-T2) on ITO in 0.1 M  $\text{NBu}_4\text{PF}_6/\text{MeCN}$ . First (red) and second (black) cycles of spincoated films from a) CB as well as annealed films at 220°C b) and 300°C c). All cycles were recorded with a scan rate of  $20 \text{ mV s}^{-1}$ .

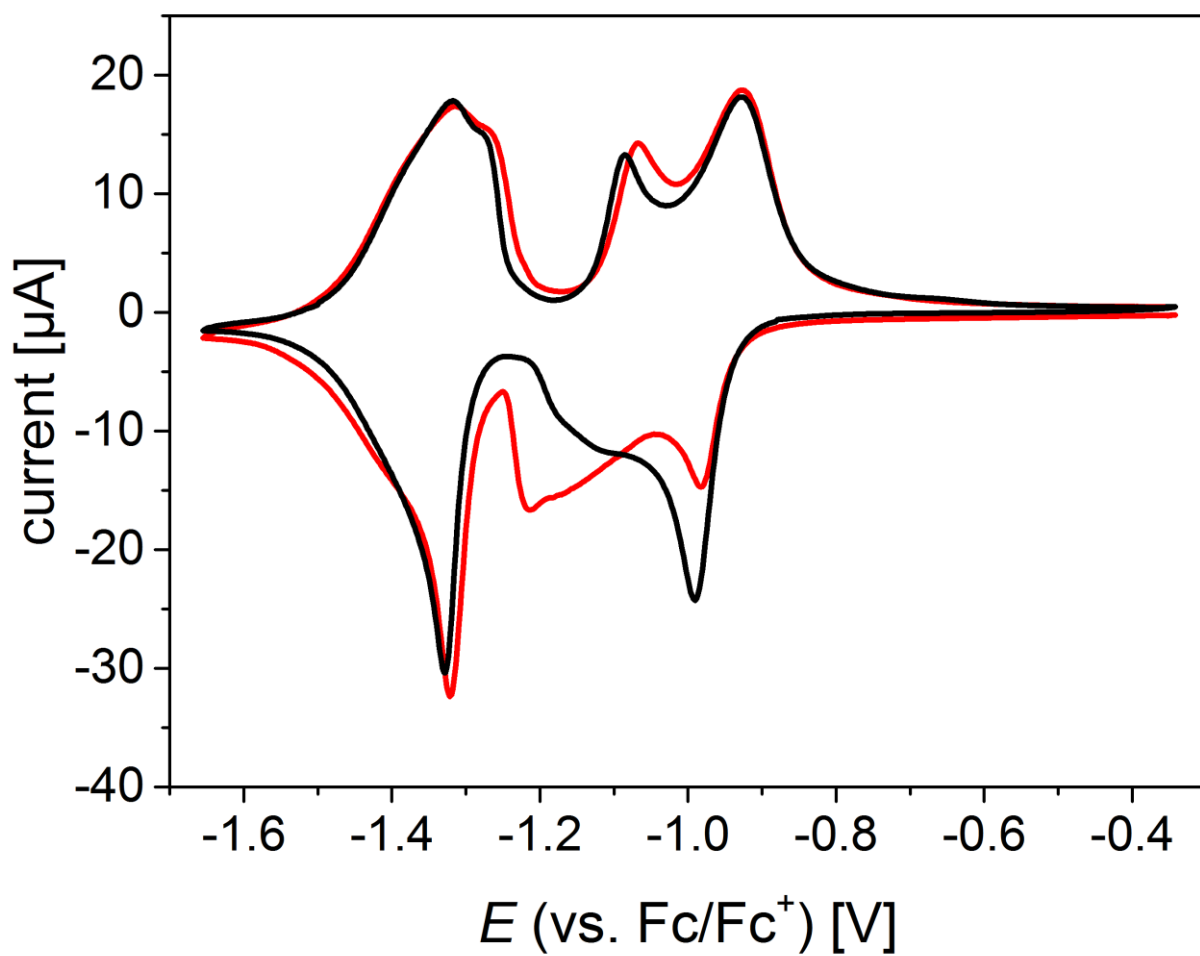

**Figure S9:** 1<sup>st</sup> (red) and 2<sup>nd</sup> (black) cycle of a N2200 (commercial P(NDI2OD-T2)) film spincoated from 3 mg/ml CB solution onto ITO in 0.1 M NBu<sub>4</sub>PF<sub>6</sub>/MeCN. All cycles were recorded with a scan rate of 20 mV s<sup>-1</sup>.

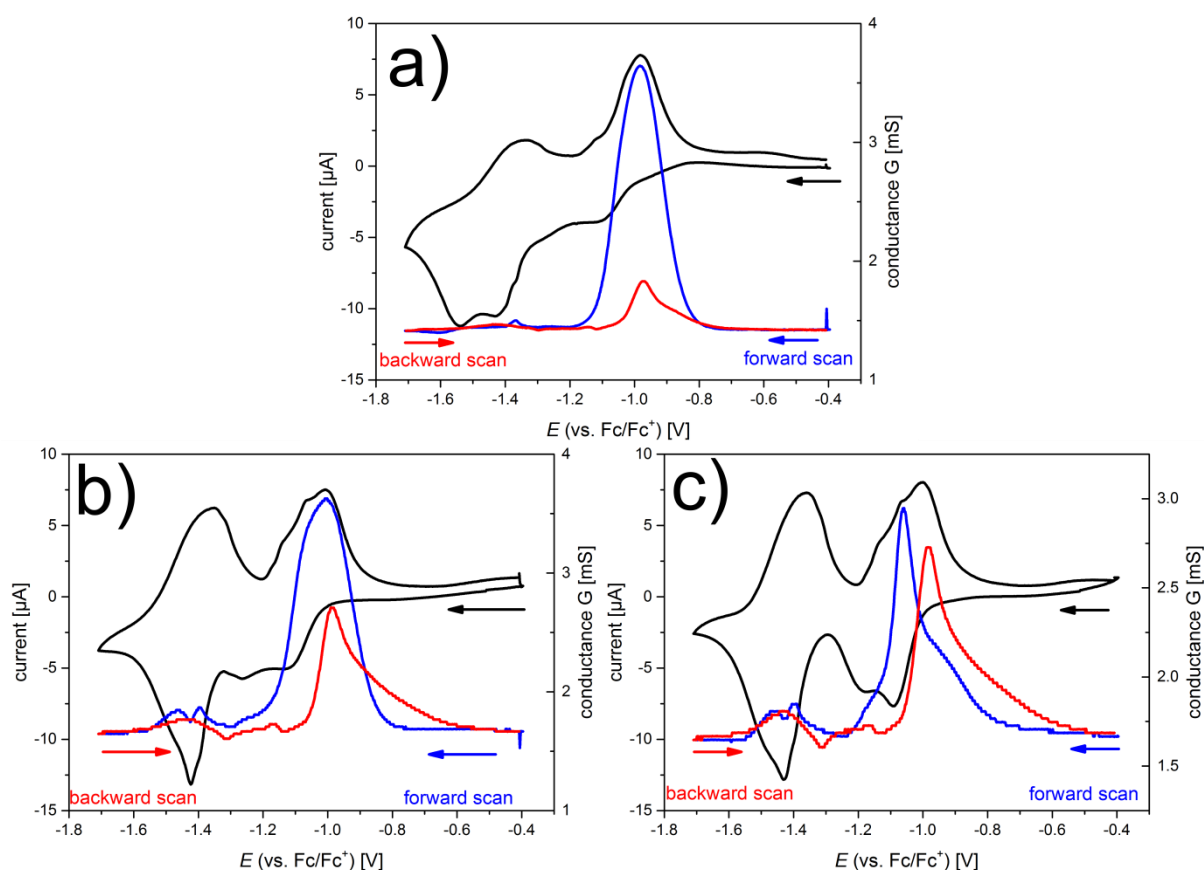

**Figure S10:** In-situ conductance (blue: forward scan and red: backward scan) and CV measurements (black) of a P(NDI2OD-T2) thin film spincoated from 3 mg/ml  $\text{CHCl}_3$  solution onto interdigitating platinum electrodes (channel length = 5  $\mu\text{m}$ , potential difference between working electrode 1 and working electrode 2: 10 mV) in 0.1 M  $\text{NBu}_4\text{PF}_6/\text{MeCN}$  with a scan rate of 20 mV/s. Note that, in our electrolyte gated transistor setup the contribution of the background current is rather high ( $\neq 0$  mS). Thus, the conductance of 1.4 mS is considered as the background current. a) 1<sup>st</sup> cycle corresponding to Figure 3 in the main text; b) 1<sup>st</sup> and c) 2<sup>nd</sup> cycle of a comparable measurement.

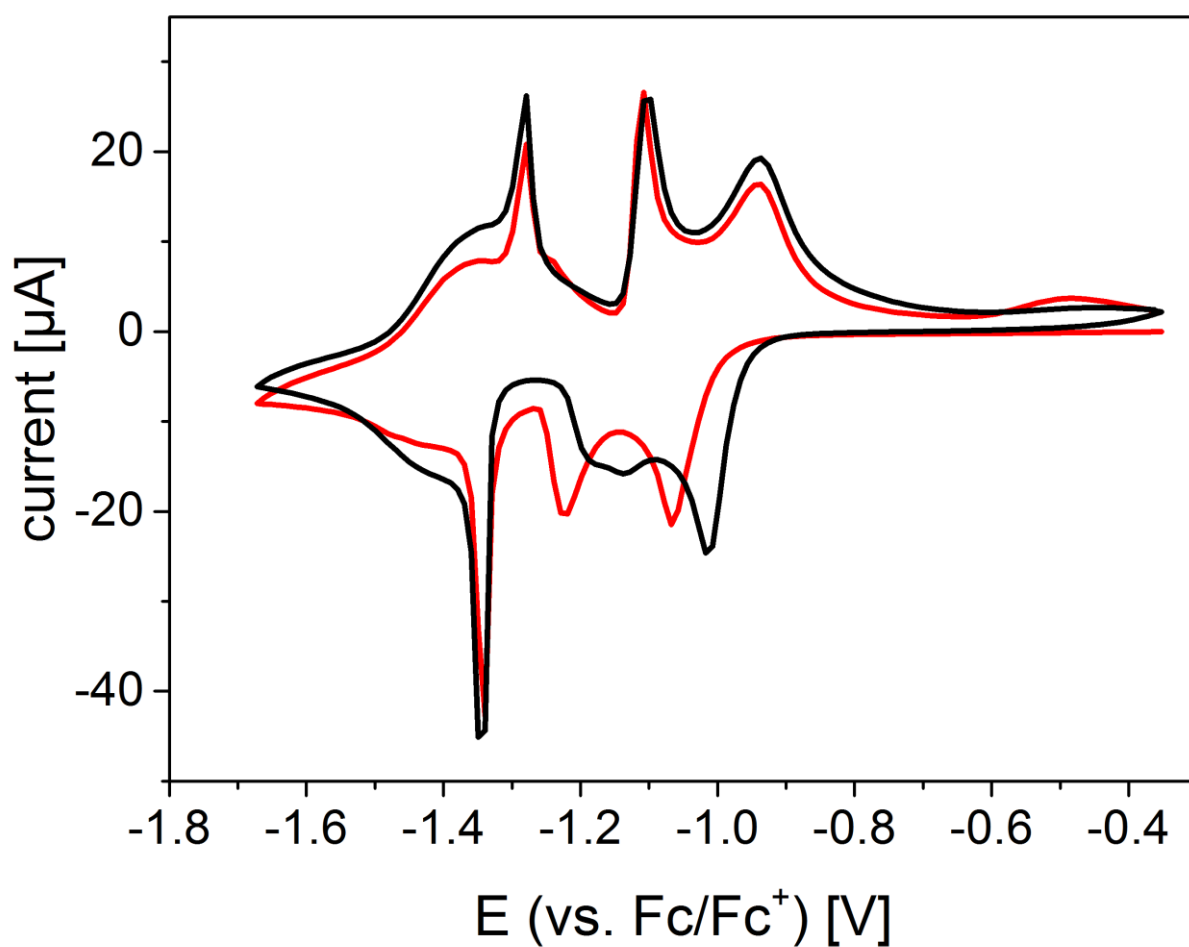

**Figure S11:** 1<sup>st</sup> (red) and 2<sup>nd</sup> (black) cycle of a P(NDI2OD-T2) film spincoated from 3 mg/ml CHCl<sub>3</sub> solution on ITO in 0.1 M NBu<sub>4</sub>PF<sub>6</sub>/MeCN. All cycles were recorded with a scan rate of 20 mV s<sup>-1</sup>.

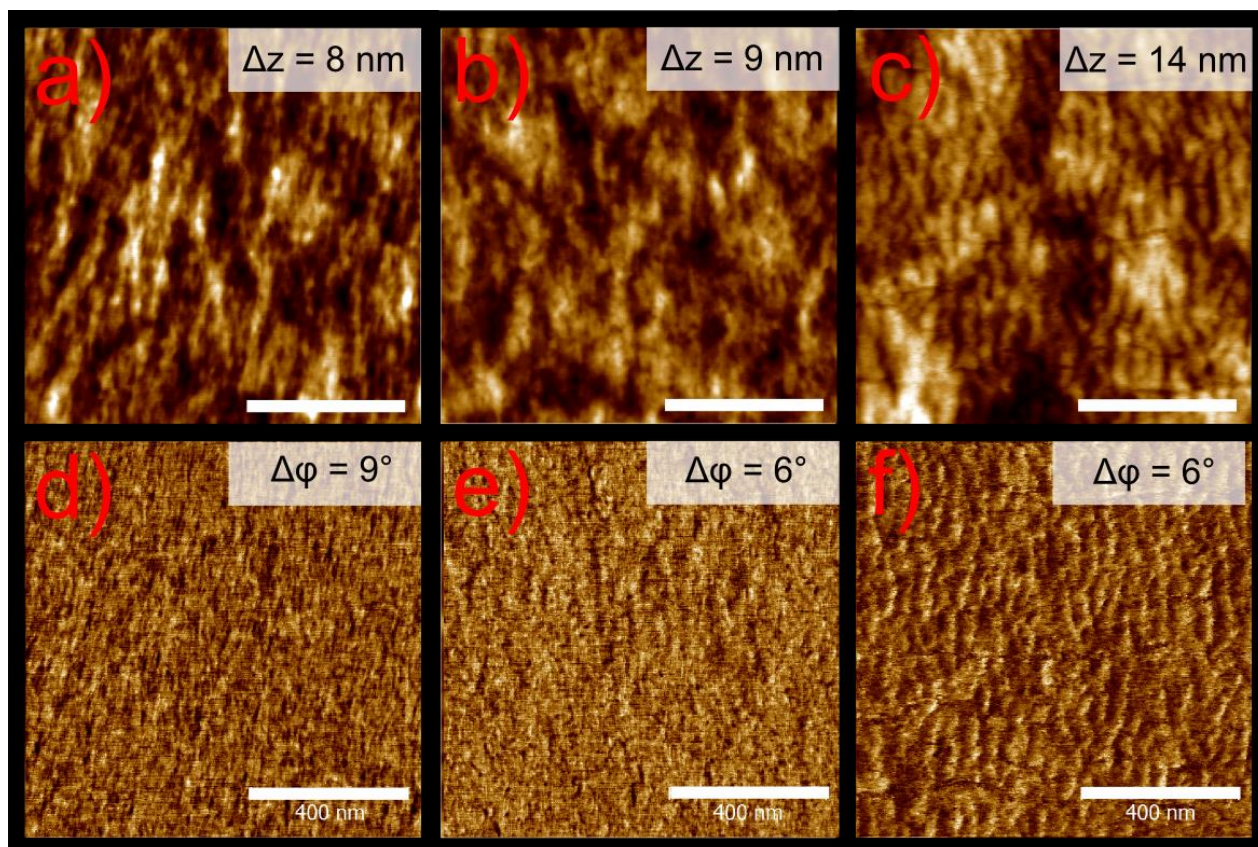

**Figure S12:** AFM images of P(NDI2OD-T2) films on ITO. AFM height a) and phase d) image of a film spincoated from CB. AFM height b) and phase e) image of a film spincoated from CB and afterwards annealed at 220°C. AFM height c) and phase f) image of a film spincoated from CB and afterwards annealed at 300°C.

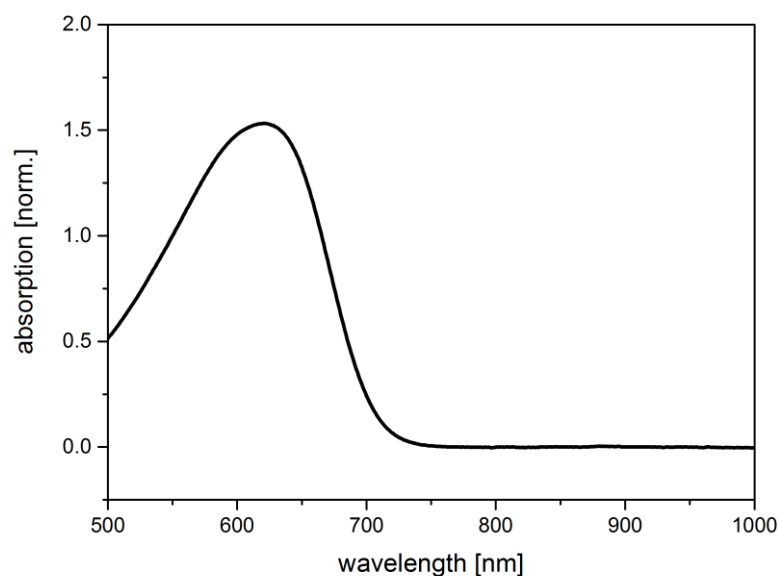

**Figure S13:** UV-vis absorption spectrum of a 0.01 mg/ml P(NDI2OD-T2) solution in 1-chloronaphthalene. The spectrum is normalized to its intensity at 550 nm.

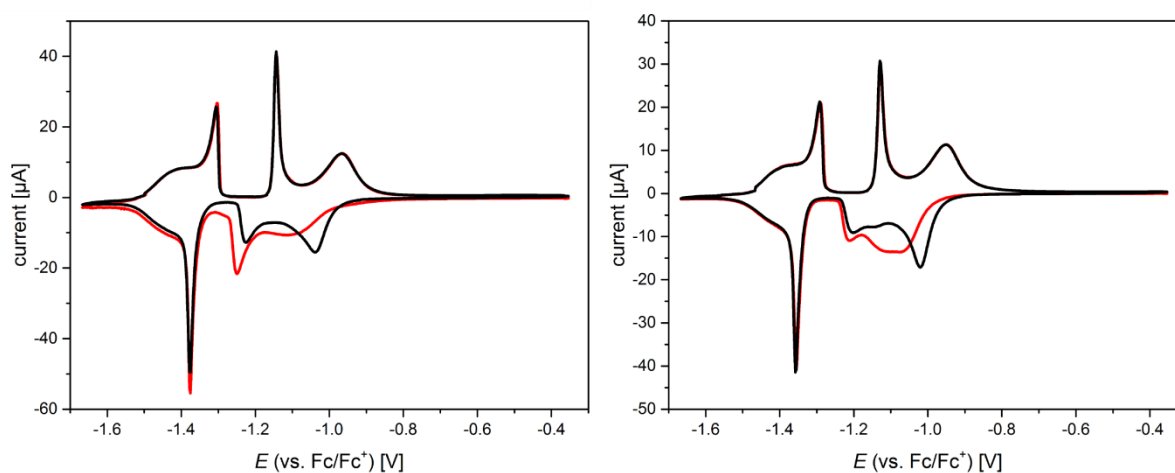

**Figure S14:** 1<sup>st</sup> (red) and 2<sup>nd</sup> (black) cycle of a P(NDI2OD-T2) film spincoated from 3 mg/ml CB solution on ITO in 0.1 M NBu<sub>4</sub>PF<sub>6</sub>/MeCN. Left: Original CVs after spincoating of the polymer film; right: CV of the same film after washing of the film with MeCN and drying at 100°C for 30 min. All cycles were recorded with a scan rate of 20 mV s<sup>-1</sup>.

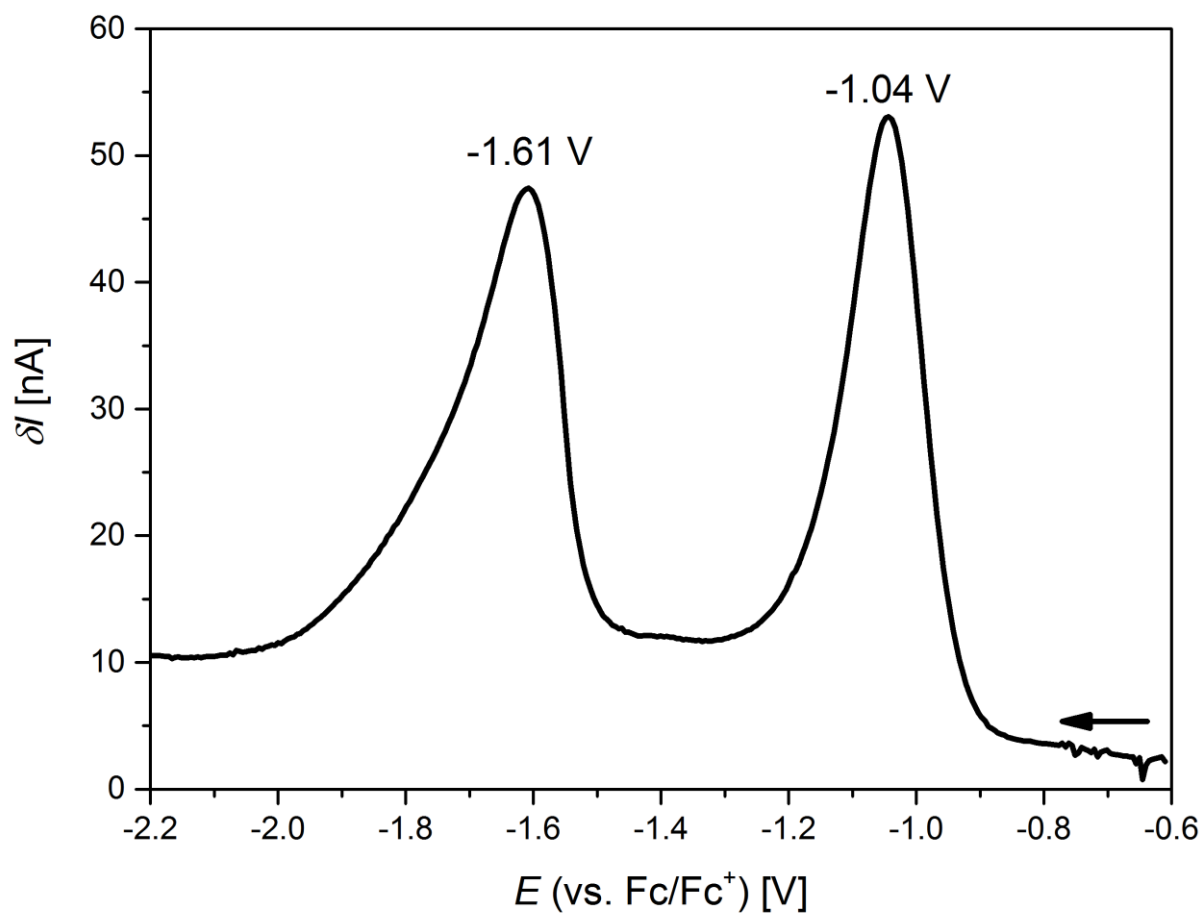

**Figure S15:** Differential pulse voltammogram (modulation amplitude: 0.025 V) of Br-NDI2OD-T2-Br in THF (1.00 mg/ml, supporting electrolyte:  $\text{NBu}_4\text{PF}_6$ ; First reduction:  $E_{\text{max}} = -1.04 \text{ V}$ ,  $E_{1/2} = -1.05 \text{ V}$ ; second reduction:  $E_{\text{max}} = -1.61 \text{ V}$ ,  $E_{1/2} = -1.62 \text{ V}$ ; pulse amplitude = 25 mV, pulse duration = 0.05 s, step potential = 5 mV, interval time = 0.5 s).

## References

- (1) Smie, A.; Synowczyk, A.; Heinze, J.; Alle, R.; Tschuncky, P.; Götz, G.; Bäuerle, P. B,  $\beta$ -Disubstituted Oligothiophenes, a New Oligomeric Approach towards the Synthesis of Conducting Polymers. *J. Electroanal. Chem.* **1998**, 452 (1), 87–95.
